# Supplementary material
Source: Springer Nature journal article supplement (https://www.springermedizin.de/resource/supplementary/12958_2009_551_MOESM5_ESM.pdf/9568294)
Supplement: MOESM5 [file 9568294]

## Vascular endothelial growth factors

(VEGF-A: placenta; VEGF-B: neural tissues; VEGF-C: placenta;  
VEGF-D: various organs except placenta and PIGF: placenta and other tissues)

**VEGF-A, PIGF**

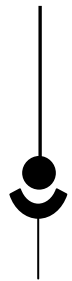

s- VEGFR-1  
(s-Flt-1)

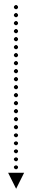

*anti-  
angiogenesis*

**VEGF-A, VEGF-B,  
PIGF**

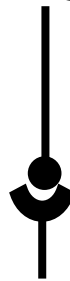

**VEGFR-1  
(Flt-1)**

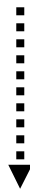

*endothelial  
tube formation*

**VEGF-A**

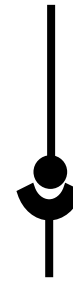

**VEGFR- 2  
(Flk, KDR)**

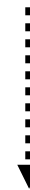

*vasodilation,  
recruitment of  
vascular pro-  
genitor cells*

**VEGF-C, VEGF-D**

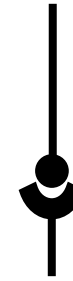

**VEGFR- 3  
(Flt- 4)**

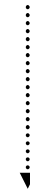

*lymphatic, endothelial cell  
development*
